# Supplementary material
Source: Springer Nature journal article supplement (https://www.springermedizin.de/resource/supplementary/12911_2011_533_MOESM11_ESM.pdf/9526026)
Supplement: MOESM11 [file 9526026]

Patients

**Predicted probabilities**  
for the equation derived from  
discriminant analysis

$>0.59$

**85.0% probability**

IgA nephropathy

0.26-0.59

Require a renal biopsy and  
histological examination

$<0.26$

**90.0% probability**

Non-IgA nephropathy
